# Supplementary material for: Naphthalimide-gold-based nanocomposite for the ratiometric detection of okadaic acid in shellfish
Source: Royal Society of Chemistry journal article supplement (doi:10.1039/d0tb01195a), 2020-01-01
Supplement: d0tb01195a1.pdf [file d0tb01195a1.pdf]

## SUPPORTING INFORMATION

### Naphthalimide – Gold based Nanocomposite for the Ratiometric Detection of Okadaic Acid in Shellfish

Meenakshi Verma,<sup>1†</sup> Monika Chaudhary,<sup>2†</sup> Amanpreet Singh,<sup>3</sup> Navneet Kaur,<sup>4\*</sup> Narinder Singh<sup>5\*</sup>

<sup>1</sup>Department of UCRD, Chandigarh University, Ghraun, Mohali, - 140413, India

<sup>2</sup>Centre for Biomedical Engineering, Indian Institute of Technology Ropar, Roopnagar, Punjab-140001, India

<sup>3</sup>Department of Chemistry, Indian Institute of Technology Ropar, Roopnagar, Punjab-140001, India

<sup>4</sup>Department of Chemistry, Panjab University, Chandigarh – 160014, India.

<sup>†</sup>Equal Contribution.

#### Table of Contents:

**Figure S1:** <sup>1</sup>H NMR of compound **5**

**Figure S2:** <sup>13</sup>C NMR of compound **5**

**Figure S3:** Mass spectra of compound **5**

**Figure S4:** <sup>1</sup>H NMR of compound **3**

**Figure S5:** <sup>13</sup>C NMR of compound **3**

**Figure S6:** Mass spectra of compound **3**

**Figure S7:** <sup>1</sup>H NMR of compound **1**

**Figure S8:** <sup>13</sup>C NMR of compound **1**

**Figure S9:** Mass spectra of compound **1**

**Figure S10:** Florescence titrations of ONPs on addition of OA ( $\lambda_{\text{max}} = 450 \text{ nm}$ )

**Figure S11:** EDAX analysis of ONPs

**Figure S12:** Florescence titrations of ONPs@Au on addition of OA ( $\lambda_{\text{max}} = 530 \text{ nm}$ )

**Figure S13:** EDAX analysis of ONPs@Au

**Figure S14.** UV-Vis absorption titrations of ONPs on addition of OA

**Figure S15.** UV-Vis absorption spectra of ONPs, ONPs@Au and composite

**Figure S16.** UV-Vis absorption titrations of ONPs@Au on addition of OA

**Figure S17.** Competitive binding studies of composite containing OA towards various metal ions

**Figure S18.** Jobs plot for the determination of stoichiometry: okadaic acid with composite in aqueous medium

**Figure S19.** Polarity effect on the detection of the Okadaic acid

**Figure S20.** MTT assay of cell viability; percentage of Hela cell after incubation for 24 hours with the fabricated composite and composite upon binding with Okadaic acid.

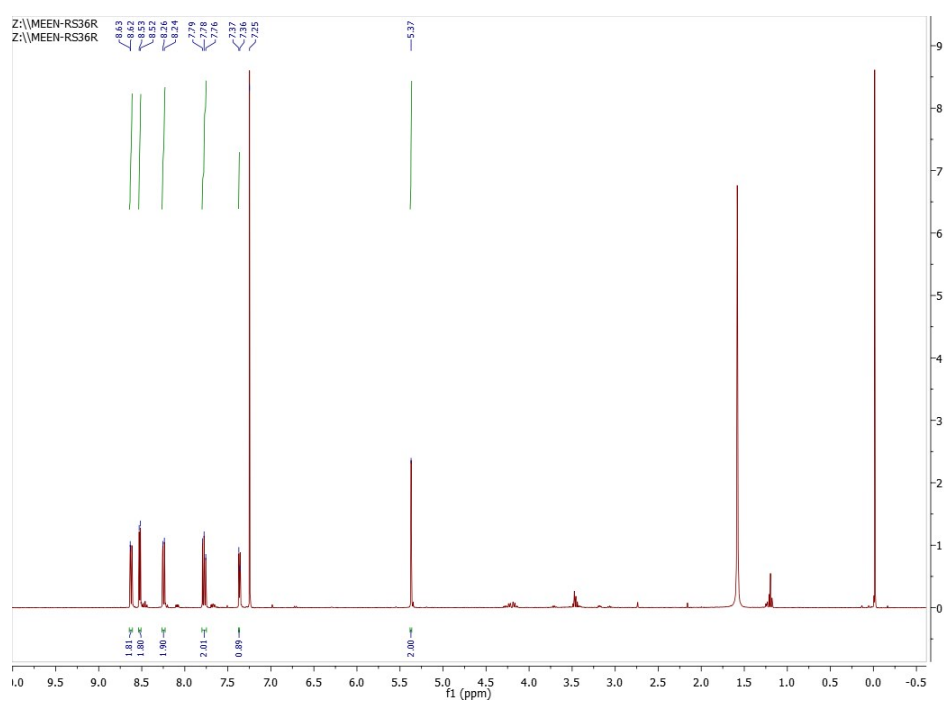

**Figure S1.**  $^1\text{H}$  NMR of compound 5

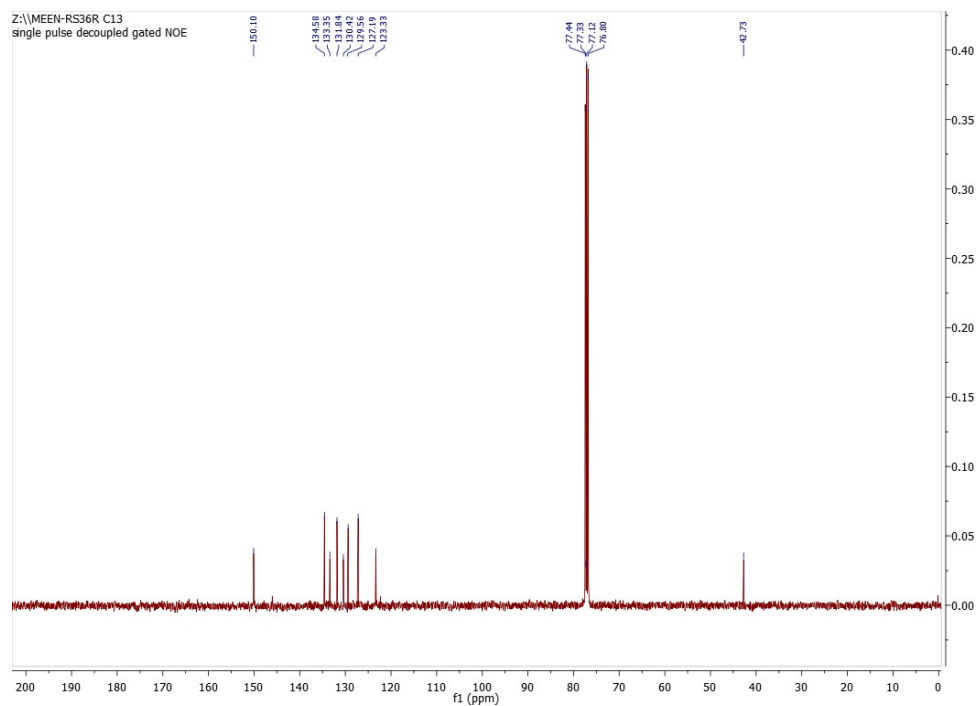

**Figure S2.**  $^{13}\text{C}$  NMR of compound **5**

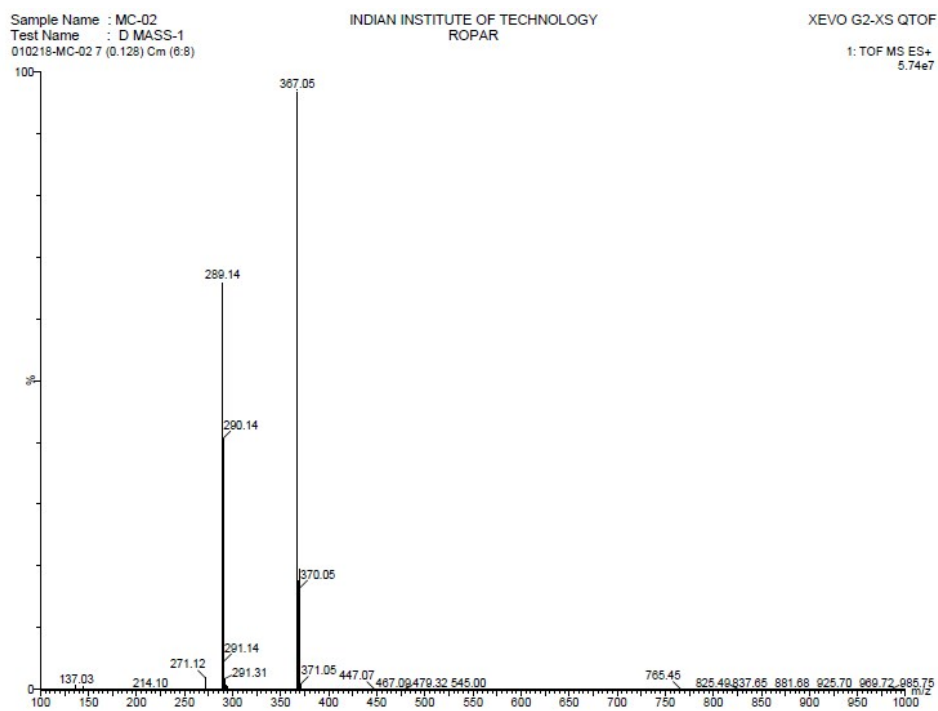

**Figure S3.** Mass spectra of compound **5**

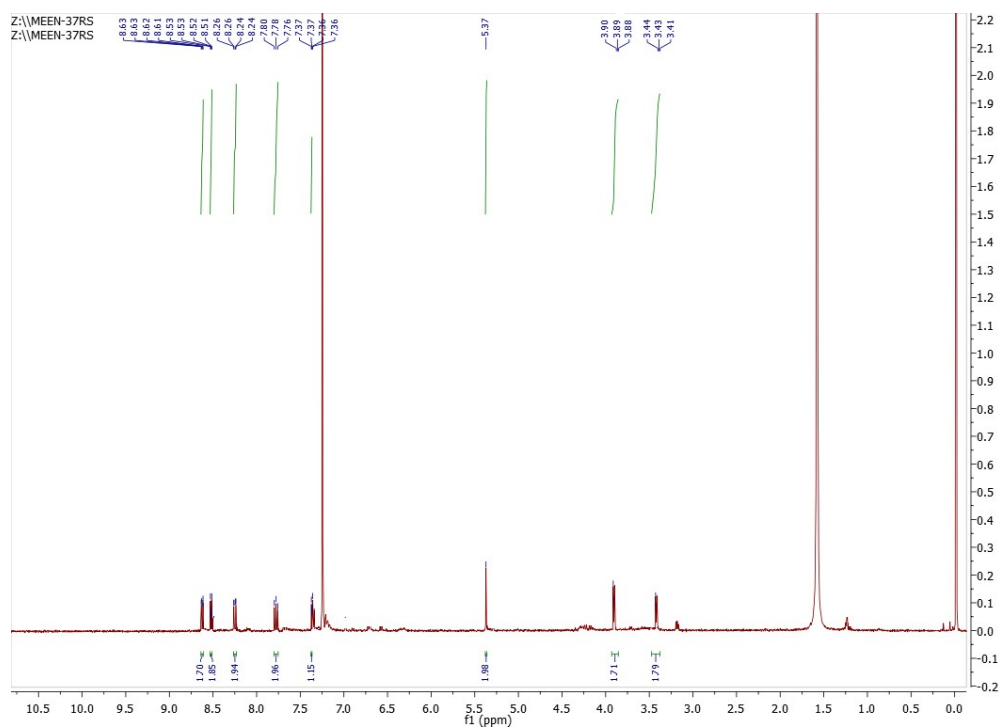

**Figure S4.**  $^1\text{H}$  NMR of compound **3**

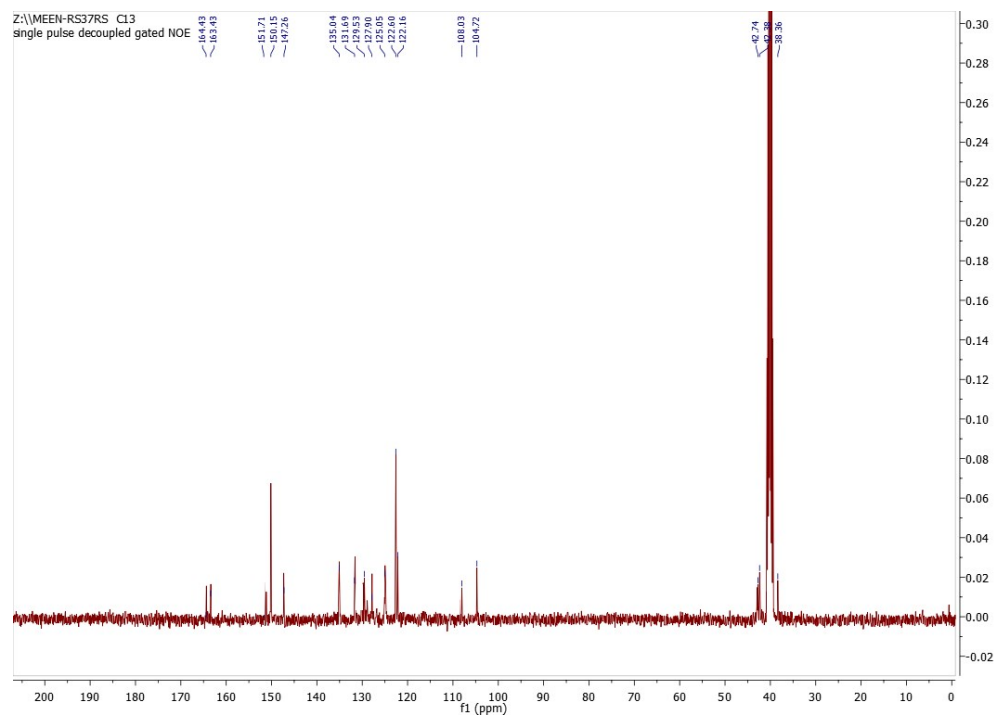

**Figure S5.**  $^{13}\text{C}$  NMR of compound **3**

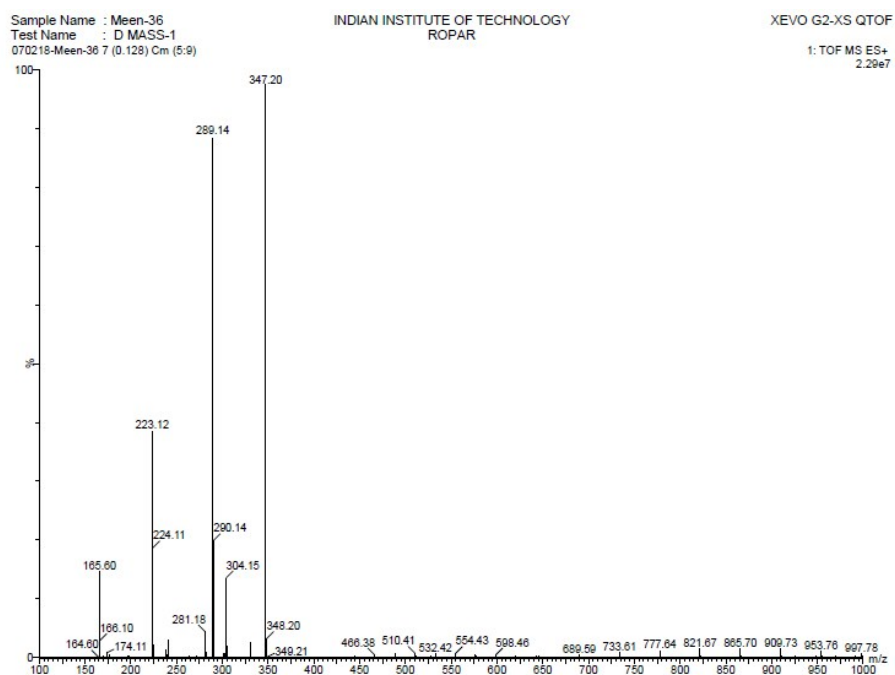

**Figure S6.** Mass spectra of compound **3**

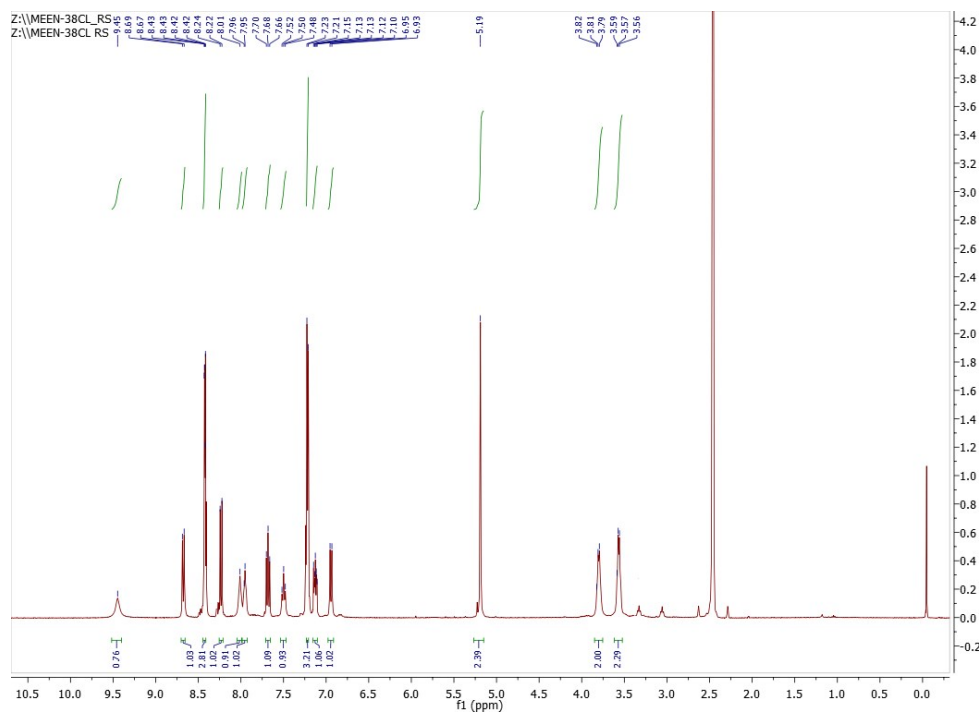

**Figure S7.**  $^1\text{H}$  NMR of compound **1**

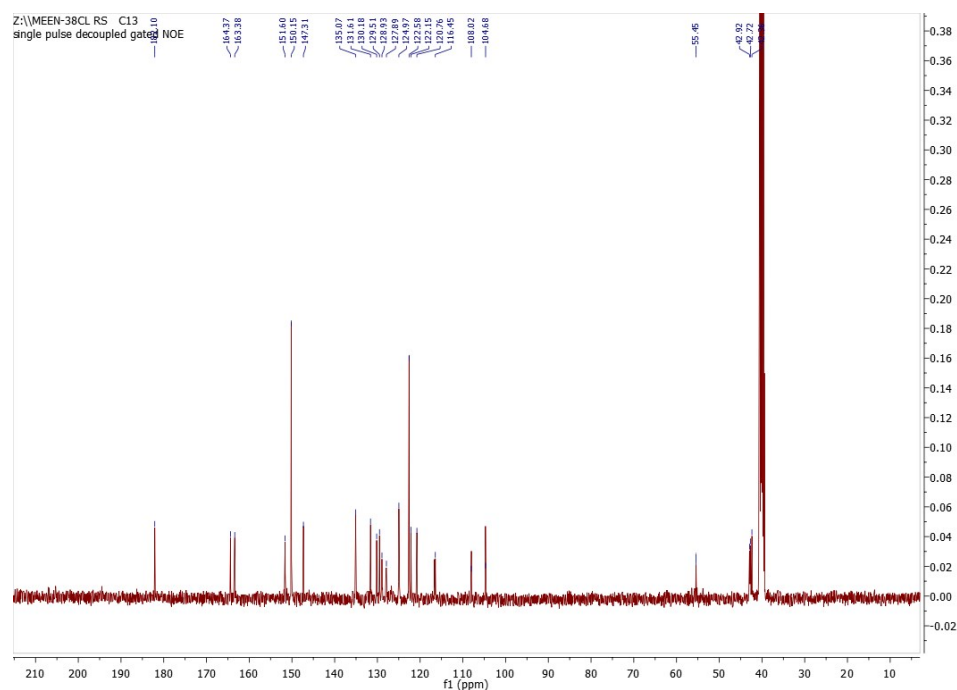

**Figure S8.**  $^{13}\text{C}$  NMR of compound **1**

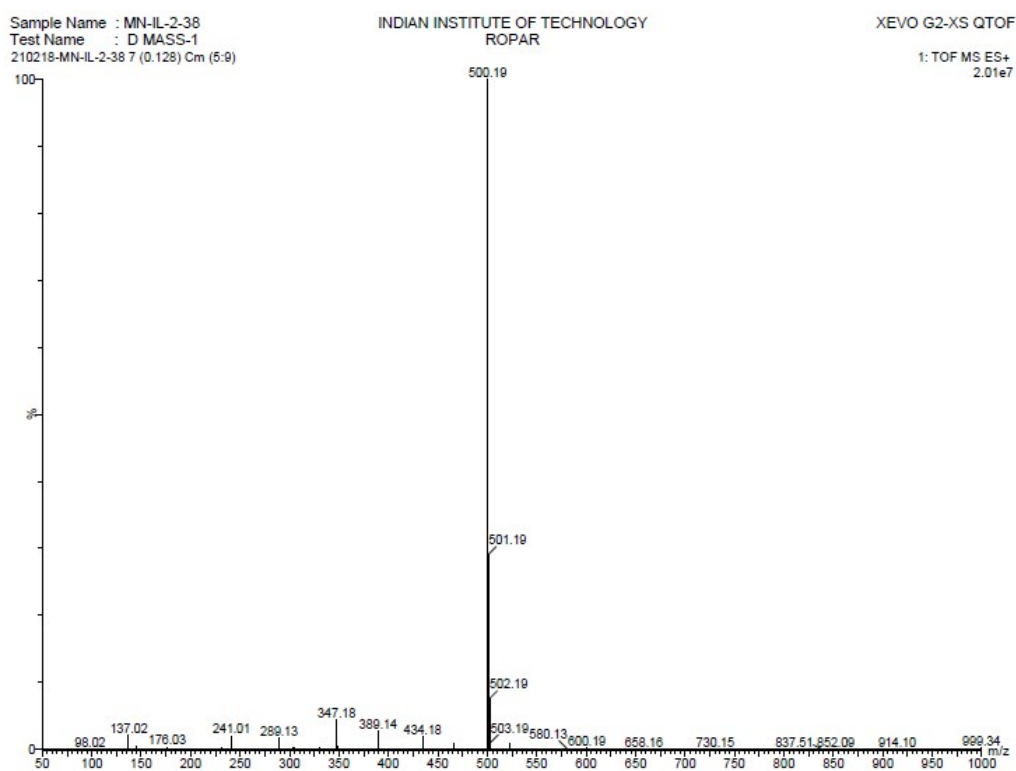

**Figure S9.** Mass spectra of compound **1**

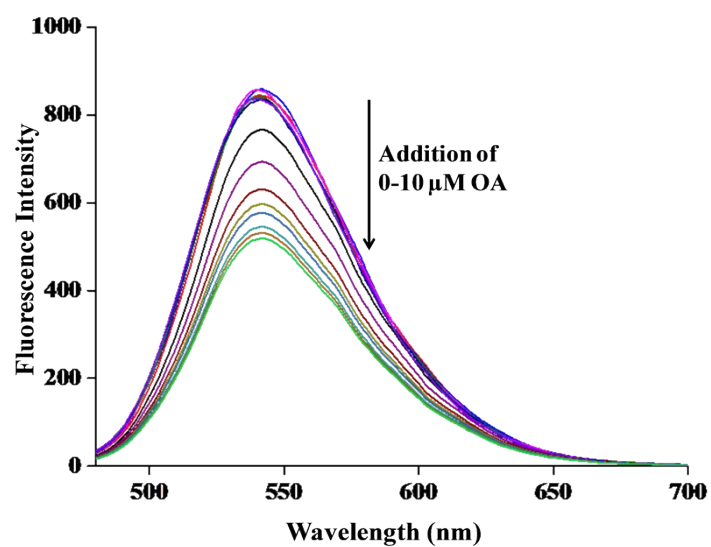

**Figure S10.** Fluorescence titrations of ONPs on addition of OA ( $\lambda_{\text{ex}} = 450 \text{ nm}$ )

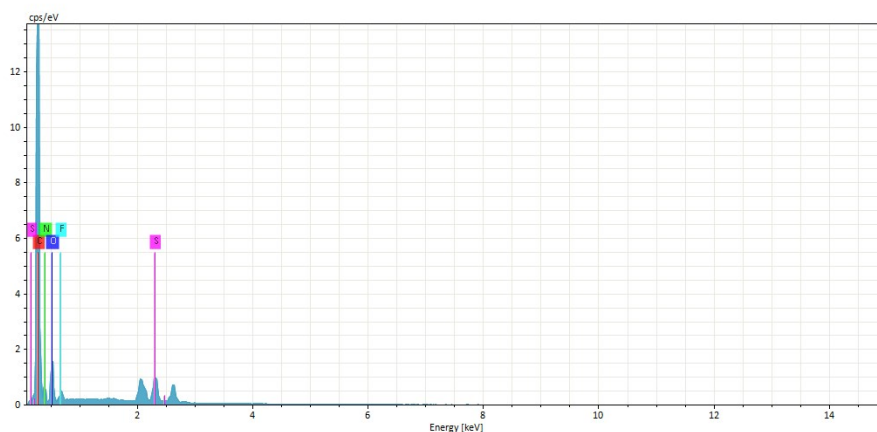

**Figure S11.** EDAX analysis of ONPs

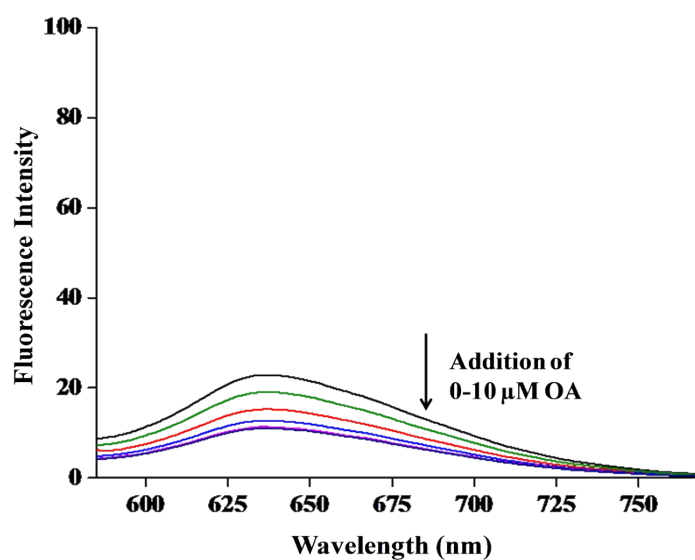

**Figure S12.** Florescence titrations of ONPs@Au on addition of OA ( $\lambda_{\text{ex}} = 530 \text{ nm}$ )

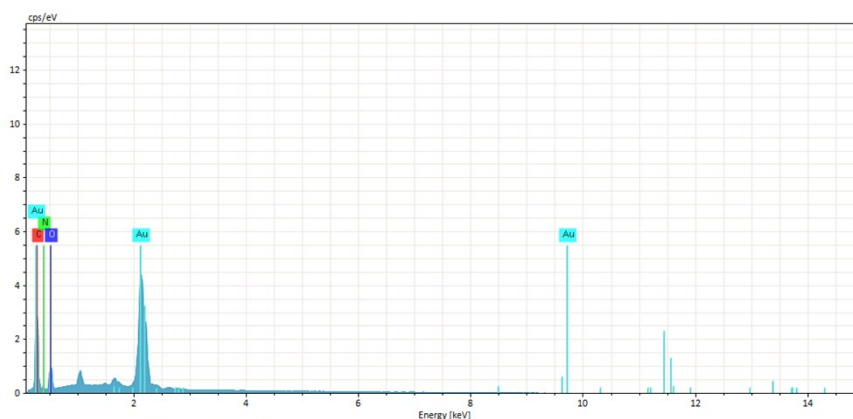

**Figure S13.** EDAX analysis of ONPs@Au

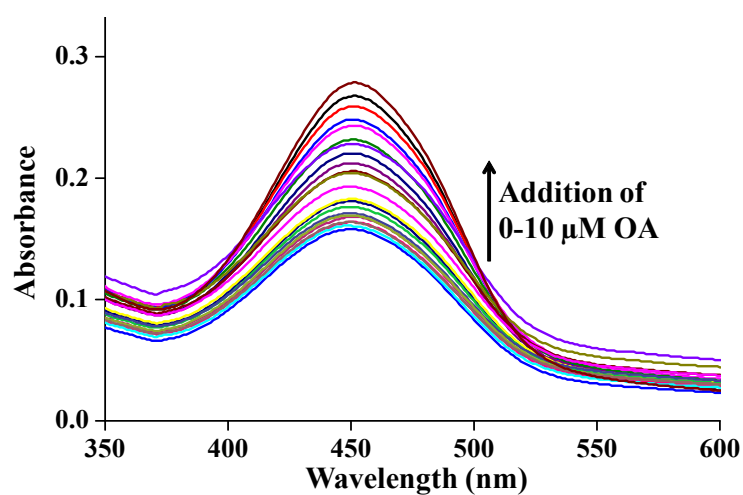

**Figure S14.** UV-Vis absorption titrations of ONPs on addition of OA

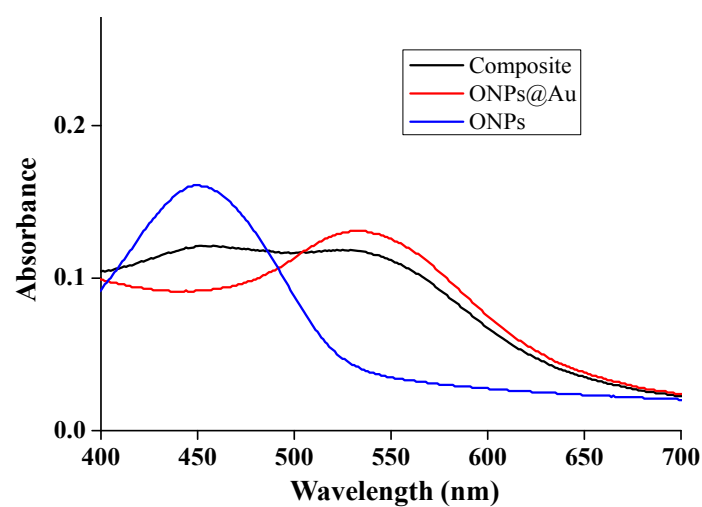

**Figure S15.** UV-Vis absorption spectra of ONPs, ONPs@Au and composite

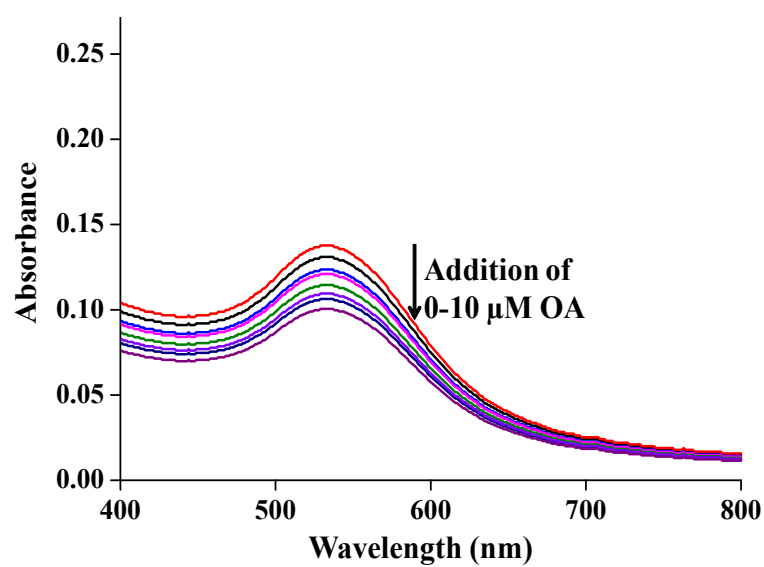

**Figure S16.** UV-Vis absorption titrations of ONPs@Au on addition of OA

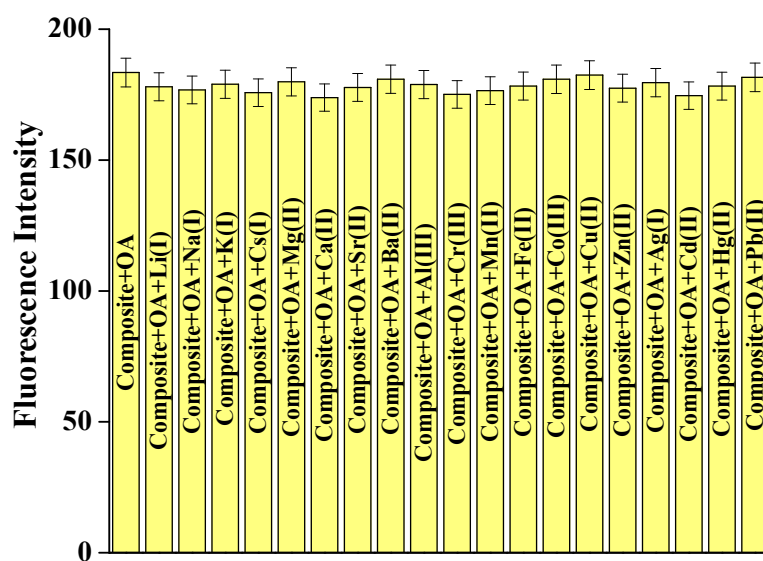

**Figure S17.** Competitive binding studies of composite containing OA towards various metal ions

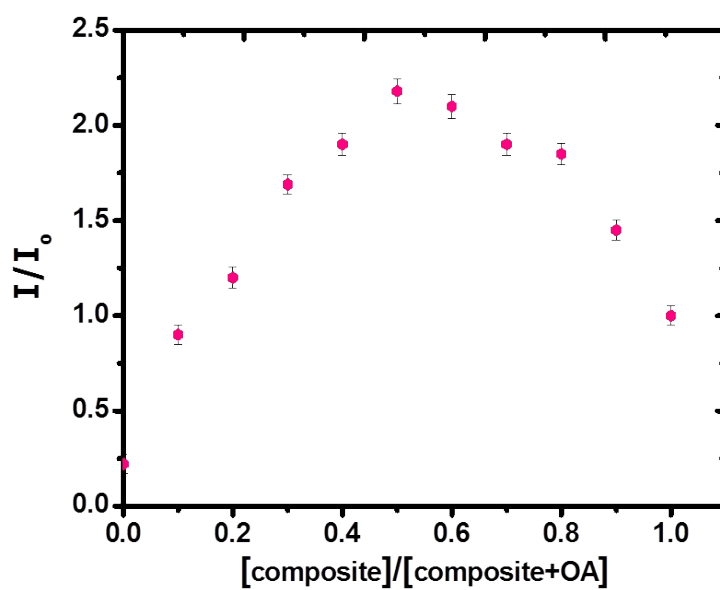

**Figure S18.** Jobs plot for the determination of stoichiometry: okadaic acid with composite in aqueous medium.

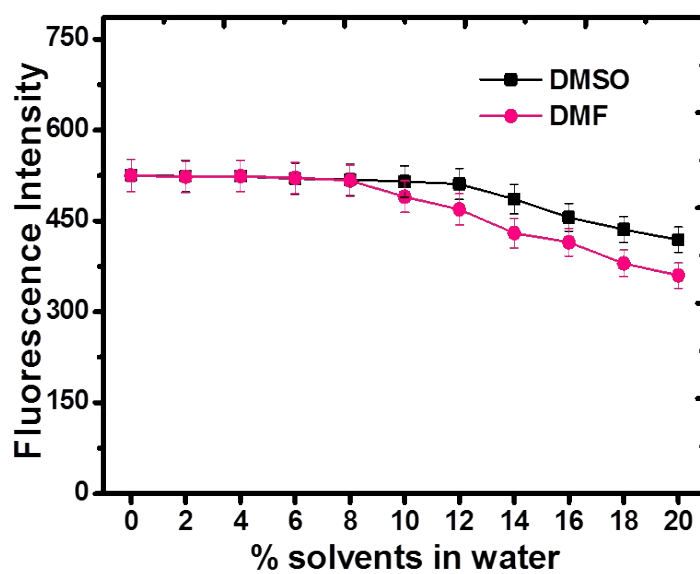

**Figure S19.** Polarity effect on the detection of the Okadaic acid.

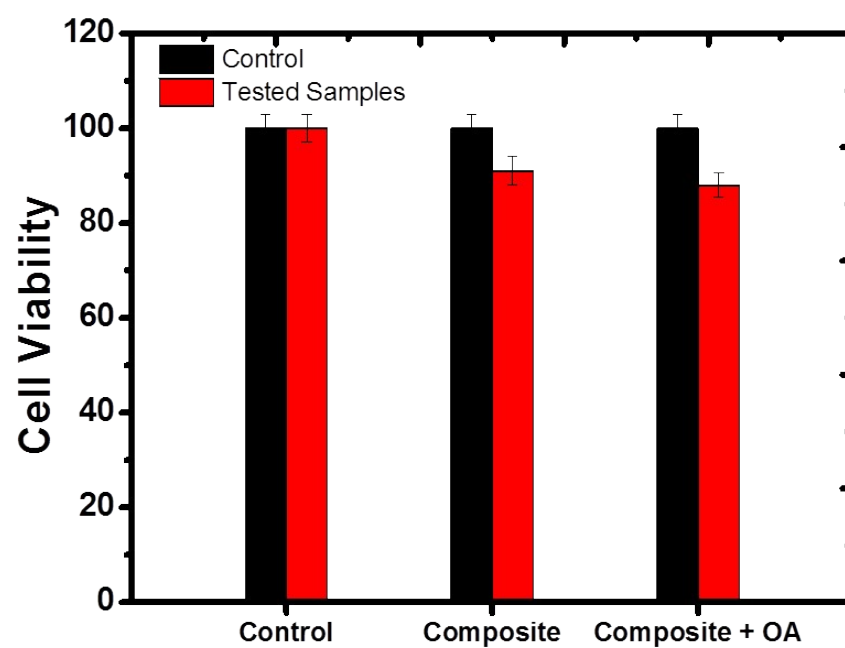

**Figure S20.** MTT assay of cell viability; percentage of Hela cell after incubation for 24 hours with the fabricated composite and composite upon binding with Okadaic acid.
